# Supplementary material for: Node Accessibility in Cortical Networks During Motor Tasks
Source: Springer Nature journal article supplement (doi:10.1007/s12021-013-9185-2), 2013-05-27
Supplement: 12021_2013_9185_MOESM1_ESM.pdf [file 12021_2013_9185_MOESM1_ESM.pdf]

## Node accessibility in cortical networks during motor tasks (Supplementary material)

Mario Chavez · Fabrizio De Vico Fallani ·  
Miguel Valencia · Julio Artieda · Donatella  
Mattia · Vito Latora · Fabio Babiloni

Received: date / Accepted: date

Table 2 reports the correlations (Spearman's rank correlation index  $|\tau|$ ) between all the topological measures used in this study. Each value was obtained as the correlation between the topological parameters of each node, averaged over all subjects, conditions and frequencies. No significant differences were found between the correlation tables of conditions or frequencies.

|            | <b>a</b> | <b>BC</b> | <b>EC</b> | <b>IC</b> | <b>PR</b> | <b>P</b> | <b>SPL</b> | <b>S</b> | <b>CC</b> |
|------------|----------|-----------|-----------|-----------|-----------|----------|------------|----------|-----------|
| <b>a</b>   |          | 0.6132    | 0.8680    | 0.8208    | 0.8537    | 0.0837   | 0.4982     | 0.7712   | 0.0601    |
| <b>BC</b>  |          |           | 0.4993    | 0.5168    | 0.5797    | 0.0345   | 0.3902     | 0.5086   | 0.2528    |
| <b>EC</b>  |          |           |           | 0.8088    | 0.7487    | 0.0708   | 0.4950     | 0.7300   | 0.1677    |
| <b>IC</b>  |          |           |           |           | 0.7313    | 0.0756   | 0.5580     | 0.7243   | 0.1172    |
| <b>PR</b>  |          |           |           |           |           | 0.1064   | 0.4414     | 0.8741   | 0.0245    |
| <b>P</b>   |          |           |           |           |           |          | 0.0074     | 0.1004   | 0.0275    |
| <b>SPL</b> |          |           |           |           |           |          |            | 0.4136   | 0.1497    |
| <b>S</b>   |          |           |           |           |           |          |            |          | 0.0608    |

**Table 2** Correlation between different topological indices: accessibility (**a**), betweenness centrality (**BC**), eigenvector centrality (**EC**), information centrality (**IC**), pagerank (**PR**), power of cortical oscillations (**P**), shortest path length (**SPL**), strength (**S**), and clustering index (**CC**). Non-significant correlation values ( $p \geq 0.01$ ) are indicated by the gray cells.
